# Supplementary material for: Deploying Elemental Iodine in a Vapor Form to Disinfect Water and to Clear Biofilms
Source: MDPI journal article supplement (doi:10.3390/ijerph17103489), 2020-05-16
Supplement: s1 [file s1]

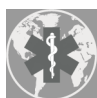

**Table S1.** Log cfu mL<sup>-1</sup> before and after treatment for 90 s with the 250-mL cylinder system.

| Sample       | Inoculum                        | Before Treatment           | Iodine Pre-Treated Water <sup>a</sup> | Iodine Treatment after Addition of Inoculum <sup>b</sup> |
|--------------|---------------------------------|----------------------------|---------------------------------------|----------------------------------------------------------|
| Water        | <i>Escherichia coli</i> K-12    | 6.13 (0.13) <sup>c,d</sup> | -                                     | - <sup>e</sup>                                           |
|              | <i>Escherichia coli</i> O157:H7 | 6.49 (0.01)                | -                                     | -                                                        |
|              | <i>Enterococcus fecalis</i>     | 6.56 (0.09)                | -                                     | -                                                        |
|              | <i>Salmonella enterica</i>      | 6.28 (0.12)                | -                                     | -                                                        |
| Water & soil | <i>Escherichia coli</i> K-12    | 7.04 (0.20)                | 6.50 (0.01)                           | -                                                        |
|              | <i>Escherichia coli</i> O157:H7 | 6.49 (0.01)                | ND                                    | -                                                        |
|              | <i>Enterococcus fecalis</i>     | 6.43 (0.19)                | ND                                    | -                                                        |
|              | <i>Salmonella enterica</i>      | 6.31 (0.04)                | ND                                    | -                                                        |
| Biofilms     | <i>Acinetobacter baumannii</i>  | 7.16 (0.09)                | ND                                    | -                                                        |
|              | <i>Staphylococcus aureus</i>    | 6.81 (0.23)                | ND                                    | -                                                        |

<sup>a</sup> I<sub>2</sub> vapor was infused 90 s before addition of bacteria. Bacteria were enumerated 90 s later.

<sup>b</sup> Bacteria were added 10 s before I<sub>2</sub> vapor infusion

<sup>c</sup> Average of biological triplicates.

<sup>d</sup> Standard error of means (SEM)

<sup>e</sup> -Below detection limit

<sup>f</sup> ND = Not determined

**Table S2.** Log cfu mL<sup>-1</sup> before and after treatment at respective times with hand-pump bucket system (3 L test volume).

| Water Source | Inoculum                     | Before Treatment         | 2 min          | 4 min       | 8 min       | ≥24 h                    |
|--------------|------------------------------|--------------------------|----------------|-------------|-------------|--------------------------|
| Distilled    | <i>Escherichia coli</i> K-12 | 6.25 (0.05) <sup>a</sup> | - <sup>b</sup> | -           | -           | ND <sup>c</sup>          |
|              | <i>Salmonella enterica</i>   | 6.83 (0.07)              | 3.76 (1.11)    | -           | -           | ND                       |
|              | <i>Enterococcus fecalis</i>  | 6.41 (0.06)              | 3.33 (1.71)    | -           | -           | ND                       |
| River        | <i>Escherichia coli</i> K-12 | 6.55 (0.26)              | 6.46 (0.22)    | 6.23 (0.07) | 2.78 (1.83) | 2.34 (1.42)              |
|              | <i>Salmonella enterica</i>   | 6.87 (0.05)              | 6.77 (0.10)    | 6.70 (0.15) | 6.30 (0.23) | 3.85 (0.11)              |
|              | <i>Enterococcus fecalis</i>  | 6.18 (0.03)              | 4.22 (2.11)    | 3.89 (1.95) | 3.84 (1.92) | 3.66 (1.83)              |
| Pond         | <i>Escherichia coli</i> K-12 | 6.55 (0.26)              | 6.46 (0.22)    | 6.23 (0.07) | 2.78 (1.83) | 2.34 <sup>d</sup> (1.42) |
|              | <i>Salmonella enterica</i>   | 6.77 (0.16)              | 6.71 (0.20)    | 6.68 (0.34) | 5.01 (1.07) | 4.09 <sup>d</sup> (0.75) |
|              | <i>Enterococcus fecalis</i>  | 6.32 (0.07)              | 6.37 (0.04)    | 6.27 (0.04) | 6.07 (0.27) | 5.74 <sup>e</sup> (0.42) |

<sup>a</sup> Value is an average of biological triplicates; standard error of means (SEM)

<sup>b</sup> -Below detection limit

<sup>c</sup> ND = not determined.

<sup>d</sup> 48 h incubation.

<sup>e</sup> 72 h incubation.

**Table S3.** Log cfu mL<sup>-1</sup> of naturally occurring bacteria before and after treatment of different water samples (3 L fluid volume, high air volume).

| Water Sample        | Time (min) | Lennox Broth Agar        | MacConkey Agar |             |
|---------------------|------------|--------------------------|----------------|-------------|
|                     |            |                          | Non-Lactose    | Lactose     |
| Lagoon <sup>a</sup> | 0          | 6.01 (0.07) <sup>b</sup> | 4.3            | 4.99 (0.01) |
|                     | 4          | 4.38 (0.04)              | 4.34 (0.10)    | 4.23 (0.08) |
|                     | 8          | 4.26 (0.02)              | 4.18 (0.10)    | 4.07 (0.01) |
|                     | 16         | 4.21 (0.03)              | 2.66 (0.36)    | 3.44 (0.06) |

|                     |    |                |             |              |
|---------------------|----|----------------|-------------|--------------|
| Lagoon <sup>c</sup> | 0  | 5.42 (0.02)    | 5.18 (0.02) | 2.91 (0.01)  |
|                     | 4  | 5.42 (0.02)    | 5.28 (0.05) | 2.91 (0.03)  |
|                     | 8  | 5.44 (0.04)    | 5.27 (0.05) | 2.91 (0.07)  |
|                     | 16 | 5.41 (0.01)    | 5.23 (0.09) | 2.84 (0.06)  |
| Sewer <sup>d</sup>  | 0  | 3.54 (0.02)    | 2.63 (0.16) | 2.18 (0.06)  |
|                     | 4  | - <sup>e</sup> | -           | -            |
|                     | 8  | -              | -           | -            |
|                     | 16 | -              | -           | -            |
| Pond <sup>d</sup>   | 0  | 3.54 (0.02)    | 2.88(0.06)  | 1.302 (0.66) |
|                     | 4  | -              | -           | -            |
|                     | 8  | -              | -           | -            |
|                     | 16 | -              | -           | -            |

<sup>a</sup> 20 ml of centrifuged dairy lagoon water was used.

<sup>b</sup> Value is an average of biological triplicates; standard error of the mean (SEM).

<sup>c</sup> 1 L of dairy lagoon water (not centrifuged) was used.

<sup>d</sup> 3 L of sample water was used

<sup>e</sup>-Below detection limit
